# Supplementary material
Source: PubMed Central journal article supplement (PMC3510525)
Supplement: MCB.01034-12_zmb999109778so1.pdf [file MCB.01034-12_zmb999109778so1.pdf]

1 **Supplemental Figure Legends**

2 **Fig. S1. Validation of phosphorylation-specific Mst1/2 antibody.** Sequential sections were  
3 stained with insulin antibody (left) or PO<sub>4</sub>-Mst1/2 antibody (center = mock phosphatase  
4 treatment, right = phosphatase treated).

5  
6 **Fig. S2. Mst1/2 knockout in the E16.5 pancreas.** Sections from embryonic day-16.5 mouse  
7 pancreas were stained with antibodies specific for Mst1/2 and E-cadherin. Note the remaining  
8 cells positive for Mst1/2 in the Hippo knockout pancreas are negative for the epithelial marker E-  
9 cadherin.

10  
11 **Fig. S3. Taz activation following Mst1/2 loss.** Pancreas sections from 6-week old offspring  
12 were probed with antibody specific for Taz. Arrows indicate areas of Taz nuclear localization.

13  
14 **Fig. S4. Time course analysis of Mst12 KO pancreas.** Pancreas was removed from offspring  
15 at the indicated age following birth (range = 2 days to 1 year) and stained with Hematoxylin and  
16 Eosin. Transitional structures, harboring mixed differentiation status, were conserved  
17 throughout the life of the Mst1/2 KO's.

18  
19 **Fig. S5. Apoptotic cells are infrequent in the Mst1/2 KO pancreas.** Sections were from 6-  
20 week old control or Mst1/2 KO offspring were TUNEL stained to determine levels of apoptosis.  
21 The positive control was provided in the commercially available kit. Numbers of apoptotic cells  
22 were not significantly different between control and Mst1/2 KO offspring.

23

24 **Fig. S1**

25  
26  
27  
28  
29  
30  
31  
32  
33  
34  
35  
36  
37  
38  
39  
40  
41  
42  
43  
44  
45  
46

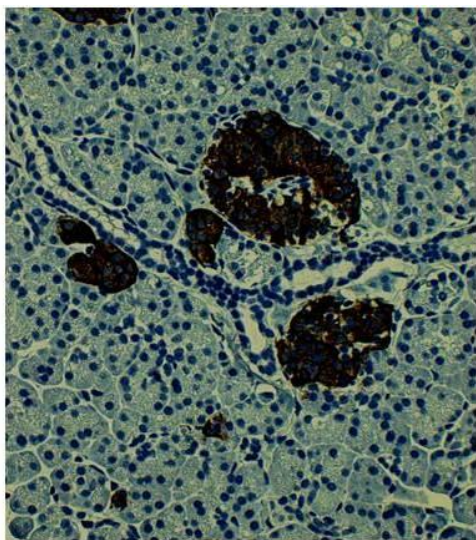

Insulin

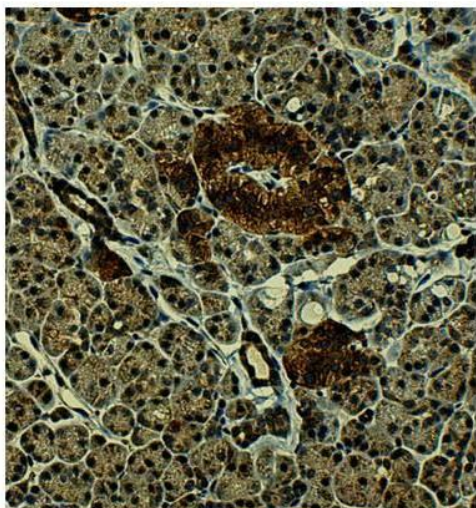

PO4-Mst1/2

- PPase

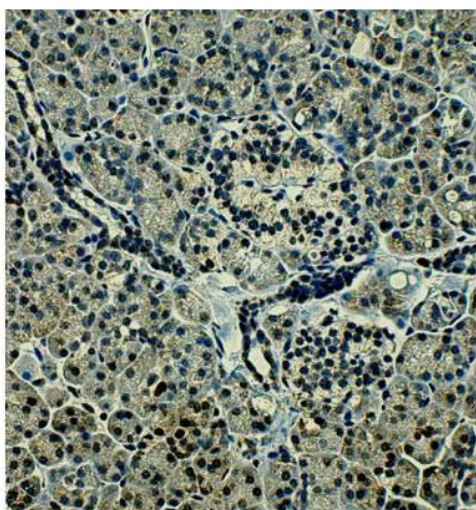

+ PPase

47 Fig. S2

48  
49  
50  
51  
52  
53  
54  
55  
56  
57  
58  
59  
60  
61  
62  
63  
64  
65  
66  
67  
68  
69

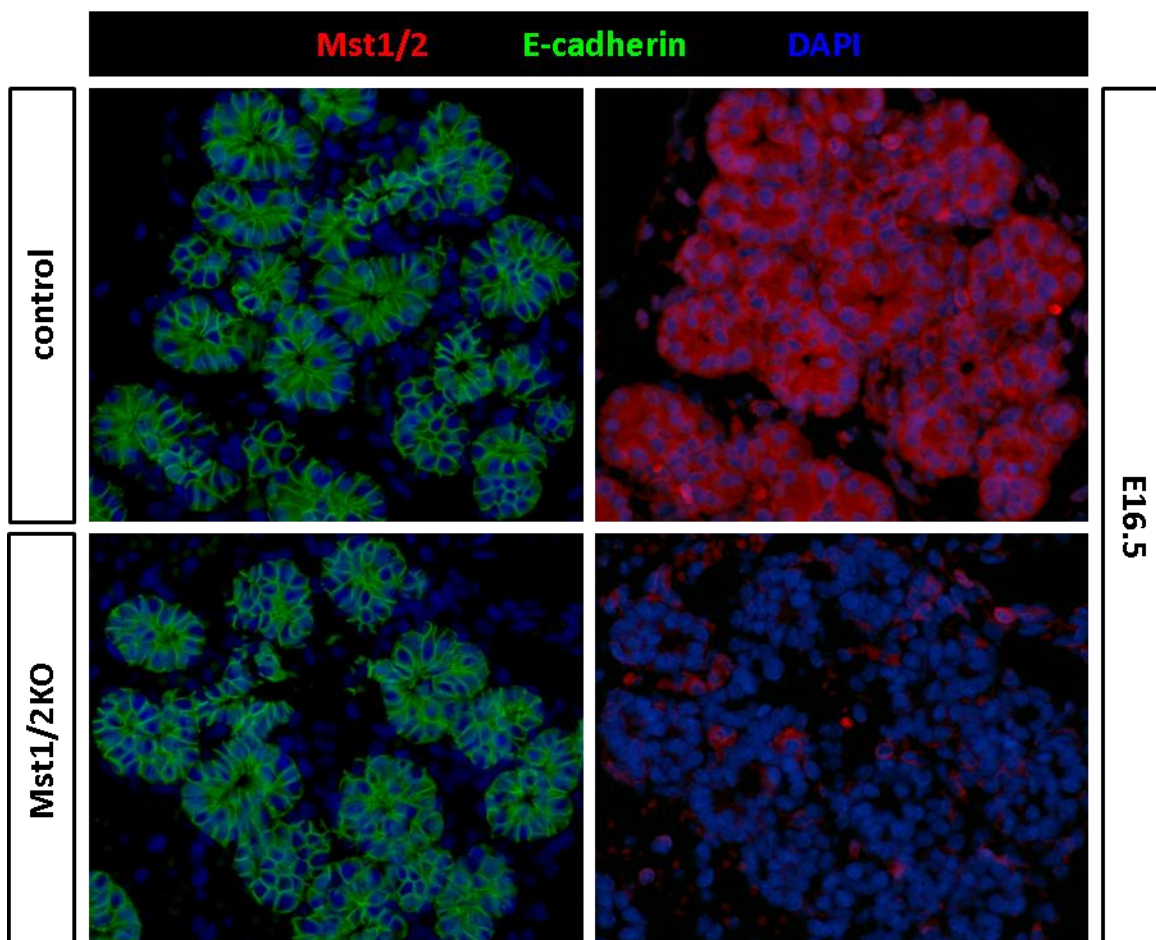

70 Fig. S3

71

72

73

74

75

76

77

78

79

80

81

82

83

84

85

86

87

88

89

90

91

92

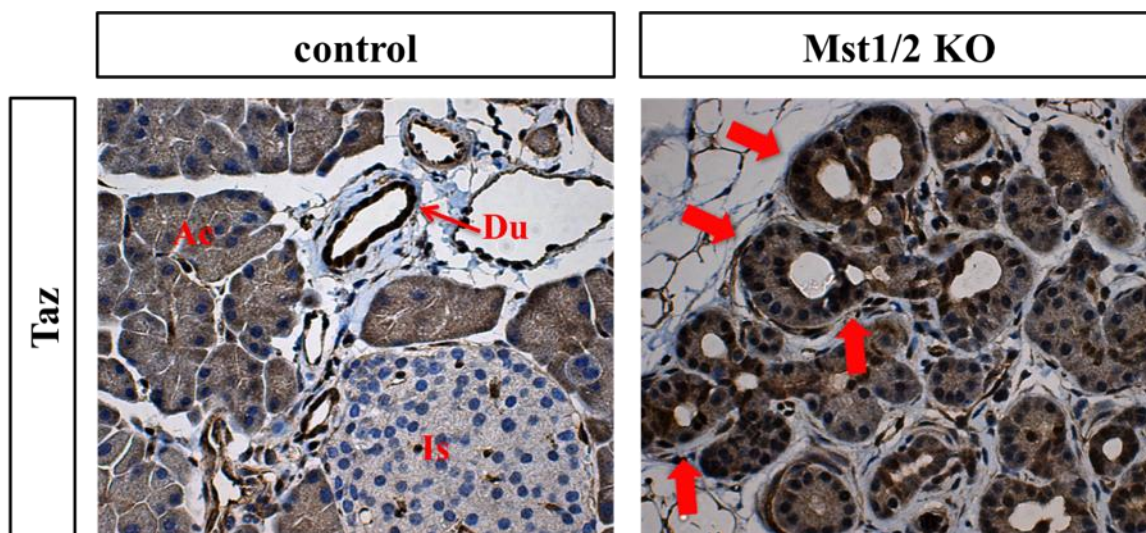



93 Fig. S4

94

95

96

97

98

99

100

101

102

103

104

105

106

107

108

109

110

111

112

113

114

115

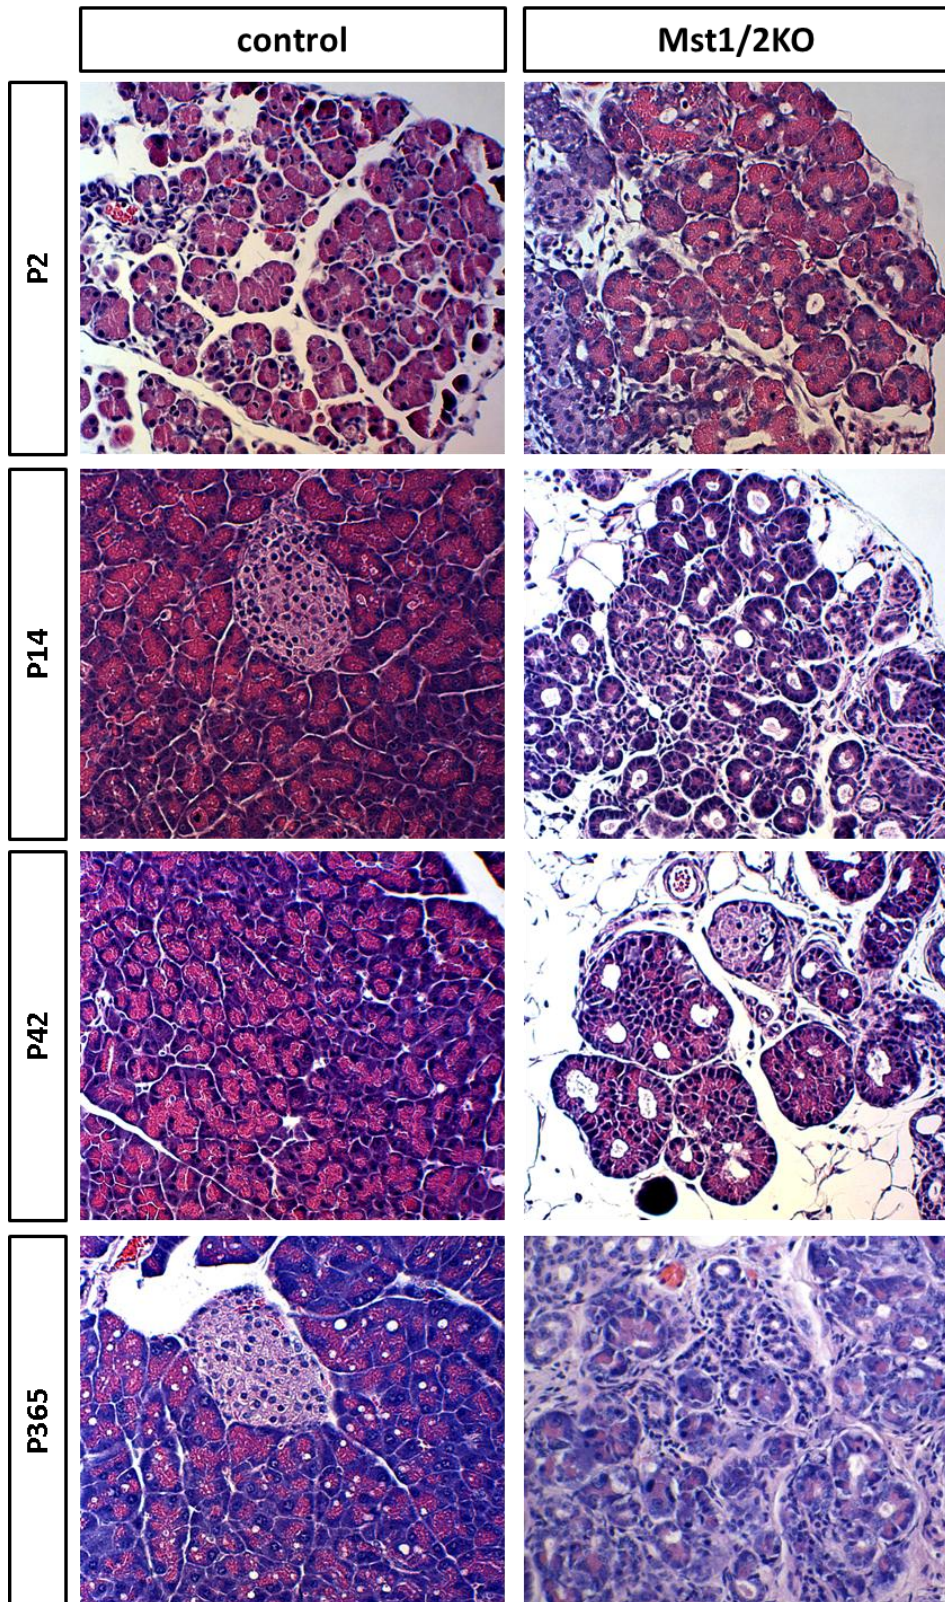

116 Fig. S5

117

118

119

120

121

122

123

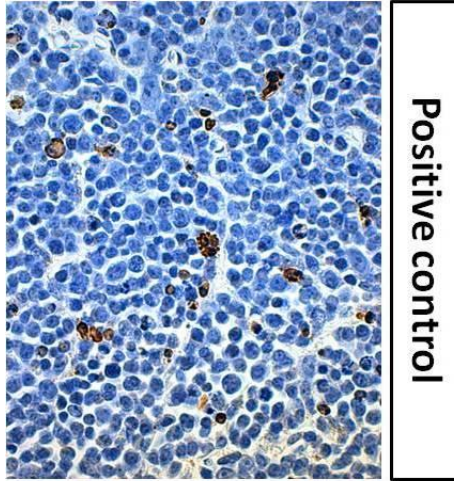

124

125

126

127

128

129

130

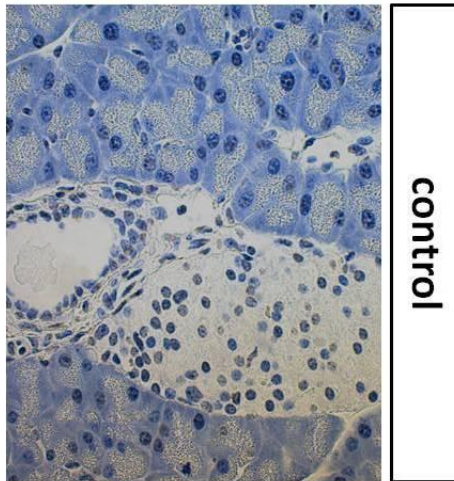

131

132

133

134

135

136

137

138

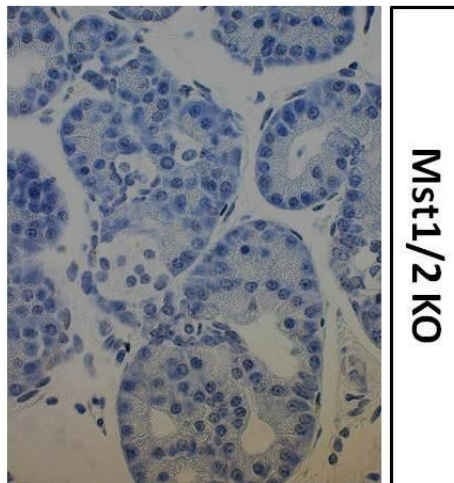



139 **Table. S1**

|     | <b>Antibody</b>         | <b>Supplier</b> | <b>Cat#</b> | <b>host</b> | <b>usage</b> |
|-----|-------------------------|-----------------|-------------|-------------|--------------|
| 140 | Ki67                    | AbCam           | ab15580     | Rabbit      | IHC/IF       |
| 141 | Mst1/2                  | AbCam           | ab87322     | Rabbit      | IF           |
|     | CD3                     | AbCam           | ab5690      | Rabbit      | IF           |
| 142 | BrdU                    | AbCam           | ab6326      | Rabbit      | IF           |
|     | Ptf1a                   | BCBC            | AB2153      | Rabbit      | IHC/IF       |
| 143 | E-Cadherin              | BD              | 610181      | Mouse       | IF           |
|     | Mac3                    | BD              | 550292      | Rat         | IHC          |
| 144 | Insulin                 | Cell Signaling  | 4590        | Rabbit      | IHC/IF       |
|     | Yap                     | Cell Signaling  | 4912        | Rabbit      | IHC/WB       |
|     | PO4-Lats1               | Cell Signaling  | 9157        | Rabbit      | WB           |
| 145 | Lats1                   | Cell Signaling  | 9153        | Rabbit      | WB           |
|     | PO4-Mst1/2              | Cell Signaling  | 3681        | Rabbit      | IHC          |
| 146 | Glucagon                | Cell Signaling  | 2760        | Rabbit      | IHC/IF       |
|     | $\beta$ -catenin        | Cell Signaling  | 9562        | Rabbit      | IHC          |
| 147 | Tcf1                    | Cell Signaling  | 2203        | Rabbit      | IHC          |
|     | PO4-S6                  | Cell Signaling  | 4858        | Rabbit      | IHC          |
| 148 | PO4-4EBP1               | Cell Signaling  | 2855        | Rabbit      | IHC          |
|     | Ngn3                    | DSHB            | F25A1B3     | Mouse       | IHC          |
| 149 | Pdx1                    | DSHB            | F6A11       | Mouse       | IHC          |
|     | CK19                    | DSHB            | TROMA-III   | Mouse       | IHC/IF       |
| 150 | c-Myc                   | Epitomics       | 1472-1      | Rabbit      | IHC          |
|     | Hes1                    | Fuchs Lab       |             | Rabbit      | IHC          |
|     | Sox9                    | Millipore       | AB5535      | Rabbit      | IHC          |
| 151 | active $\beta$ -catenin | Millipore       | 05-665      | Mouse       | IHC          |
|     | CPA1                    | ProteinTech     | 15836-1-AP  | Rabbit      | WB           |
| 152 | Yap1                    | ProteinTech     | 13584-1-AP  | Rabbit      | IF           |
|     | Sox9                    | Santa Cruz Bio  | sc-17341    | Goat        | IF           |
| 153 | Insulin                 | Sigma           | I2018       | Mouse       | IF           |
|     | Amylase                 | Sigma           | A8273       | Rabbit      | IHC/IF       |
| 154 | Taz                     | Sigma           | HPA007415   | Rabbit      | IHC          |
|     | BrdU                    | Thermo Sci      | MS-1058-P0  | Mouse       | IHC          |
| 155 | PO4-Yap                 | Thermo Sci      | PA5-17481   | Rabbit      | IHC          |
|     | Mist1                   | Thermo Sci      | MA1-517     | Mouse       | IHC          |
| 156 | Muc1                    | Thermo Sci      | Ab-5        | Hamster     | IF           |
